# Supplementary material for: Surface oxygen vacancies on Co3O4 mediated catalytic formaldehyde oxidation at room temperature
Source: Royal Society of Chemistry journal article supplement (doi:10.1039/c5cy01709b), 2015-12-28
Supplement: c5cy01709b1.pdf [file c5cy01709b1.pdf]

## Supporting Information for

### Surface oxygen vacancies over $\text{Co}_3\text{O}_4$ mediated catalytic formaldehyde oxidation at room temperature

Zhong Wang<sup>a,b</sup>, Wenzhong Wang<sup>\*a</sup>, Ling Zhang<sup>a</sup>, and Dong Jiang<sup>a,b</sup>

<sup>a</sup> *State Key Laboratory of High Performance Ceramics and Superfine Microstructure,  
Shanghai Institute of Ceramics, Chinese Academy of Sciences, 1295 Dingxi Road,  
Shanghai 200050, People's Republic of China*

<sup>b</sup> *University of Chinese Academy of Science, Beijing 100049, People's Republic of  
China*

---

\* Corresponding author, Fax: +86-21-5241-3122, Email: wzwang@mail.sic.ac.cn

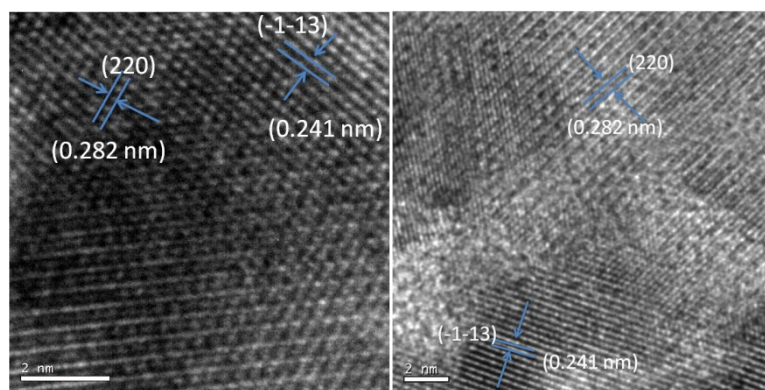

**Figure S1.** HRTEM images of  $\text{Co}_3\text{O}_4$  nanobelts.

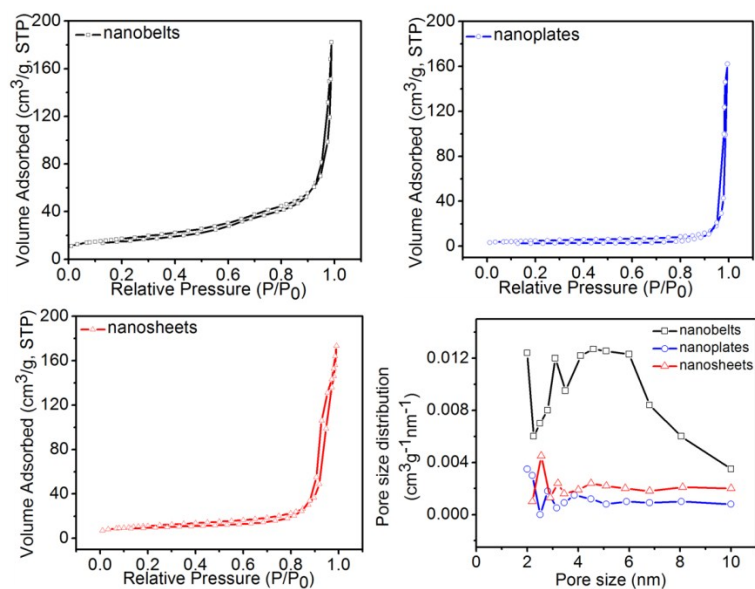

**Figure S2.** Nitrogen adsorption-desorption isotherms of different  $\text{Co}_3\text{O}_4$  catalysts with corresponding pore-size distribution.

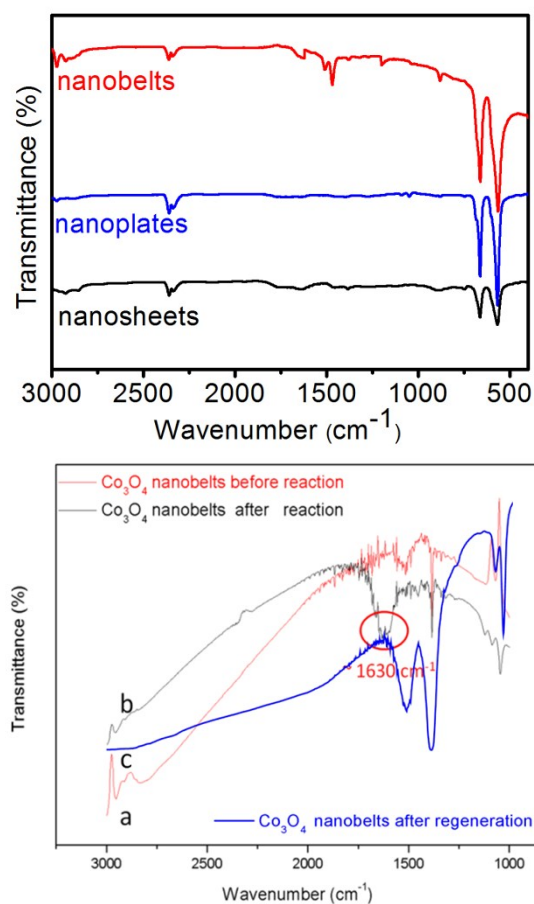

**Figure S3.** FTIR spectra of three Co<sub>3</sub>O<sub>4</sub> catalysts

FTIR spectra of nanobelts before (a) and after (b) reaction, after regeneration (c)

For all the samples, the two absorption bands at 565 cm<sup>-1</sup> and 661 cm<sup>-1</sup> can be ascribed to the stretching vibration of Co<sup>3+</sup>-O and Co<sup>2+</sup>-O bond, confirming the formation of Co<sub>3</sub>O<sub>4</sub>.

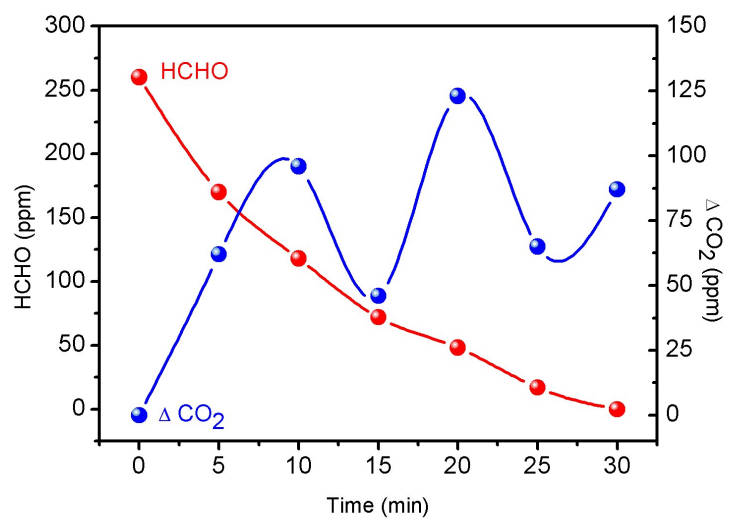

**Figure S4.** Respective concentration changes of formaldehyde and carbon dioxide as a function of time over  $\text{Co}_3\text{O}_4$  nanobelts.
